# Supplementary material for: A Wrinkling and Etching-Assisted Regrowth Strategy for Large-Area Bilayer Graphene Preparation on Cu
Source: MDPI journal article supplement (doi:10.3390/nano13142059), 2023-07-12
Supplement: s1 [file s1]

# A Wrinkling and Etching-Assisted Regrowth Strategy for Large-Area Bilayer Graphene Preparation on Cu

Qiongyu Li <sup>1,\*</sup>, Tongzhi Liu <sup>1</sup>, You Li <sup>2</sup>, Fang Li <sup>2</sup>, Yanshuai Zhao <sup>1</sup> and Shihao Huang <sup>1</sup>

<sup>1</sup> School of Electronic, Electrical Engineering and Physics, Fujian University of Technology, Fuzhou 350118, China

<sup>2</sup> MIT Key Laboratory of Semiconductor Microstructure and Quantum Sensing, Department of Applied Physics, Nanjing University of Science and Technology, Nanjing 210094, China

\* Correspondence: qyli@njut.edu.cn

## Methods

Growth of <sup>12</sup>C/<sup>13</sup>C Graphene.

The system was first vacuumed to 0.3 pa and heated to 1030°C. Then a mixture gas of 10 sccm H<sub>2</sub> and 5 sccm <sup>13</sup>CH<sub>4</sub> is subsequently flowed into the CVD chamber to initiate the bilayer growth (20 min). After the first growth step, the methane flow was cut off and the system was fast-cooled down to 200 °C in 6 min. Then the system was reheated to 1030 °C in 15 min and annealed in the same atmosphere for 20 min. After etching, 5 sccm <sup>12</sup>CH<sub>4</sub> was first introduced for 5 min, then followed by 5 sccm <sup>13</sup>CH<sub>4</sub> for 5 min/5 sccm <sup>12</sup>CH<sub>4</sub> for 5 min /5 sccm <sup>13</sup>CH<sub>4</sub> for 5 min /5 sccm <sup>12</sup>CH<sub>4</sub> for 5min. The regrowth time was 25 min. After growth, the system was first cooled to room temperature in H<sub>2</sub> atmosphere.

**Table S1.** Growth parameters for large-area bilayer graphene.

| Cycle | Temperature<br>(°C) | Flow ratio<br>(H <sub>2</sub> :CH <sub>4</sub> ) | Growth time |
|-------|---------------------|--------------------------------------------------|-------------|
| 1st   | 1030                | 20:10                                            | 24 min      |
| 2nd   | 1030                | 20:8                                             | 36min       |
| 3rd   | 1030                | 20:6                                             | 44min       |
| 4th   | 1030                | 20:4                                             | 1h          |

**Table S2.** Comparison of the flow ratio, growth time and coverage of bilayer graphene obtained on Cu by CVD.

| Temperature<br>(°C) | Flow ratio<br>(H <sub>2</sub> :CH <sub>4</sub> ) | Coverage | Growth time | Reference |
|---------------------|--------------------------------------------------|----------|-------------|-----------|
| 1050                | 40:1                                             | 99%      | 3h          | 36        |
| 1045                | 120:1                                            | 30%      | 2h          | 37        |
| 1000                | 40:1                                             | 50%      | 70min       | 38        |
| 1000                | 35:1.5                                           | 61%      | 180min      | 34        |
| 1000                | 500:0.5                                          | 95%      | 3h          | 19        |
| 1050                | 200:0.5                                          | 56%      | 90min       | 39        |
| 1040                | 50:2                                             | 76%      | 60min       | 23        |
| 1100                | 100:10                                           | 100%     | 70min       | 16        |
| 1020                | 20:1                                             | 93%      | 45min       | 40        |
| 1020                | 100:20                                           | 100%     | 20min       | 41        |

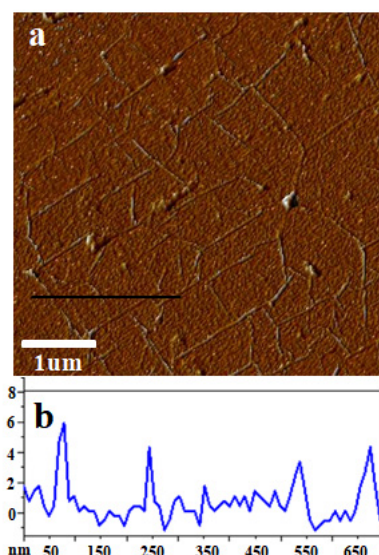

**Figure S1.** (a) AFM image of wrinkled graphene transferred onto SiO<sub>2</sub>/Si; (b) The height of the thick black line marked region.

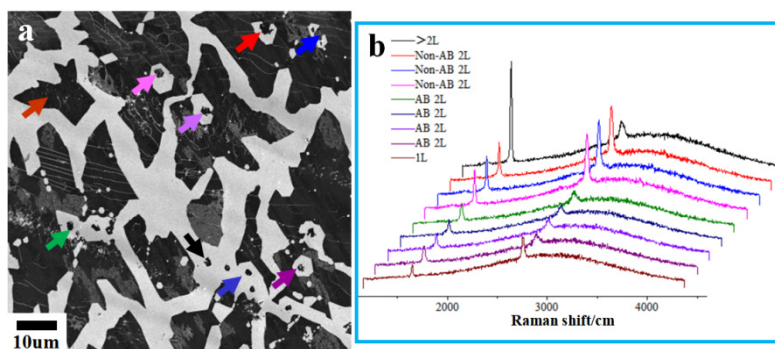

**Figure S2.** (a) SEM image of H<sub>2</sub> induced etching of wrinkled graphene. (e) Raman spectra of the different remaining graphene area (pointed by colored arrow in (a)) on Cu foil.

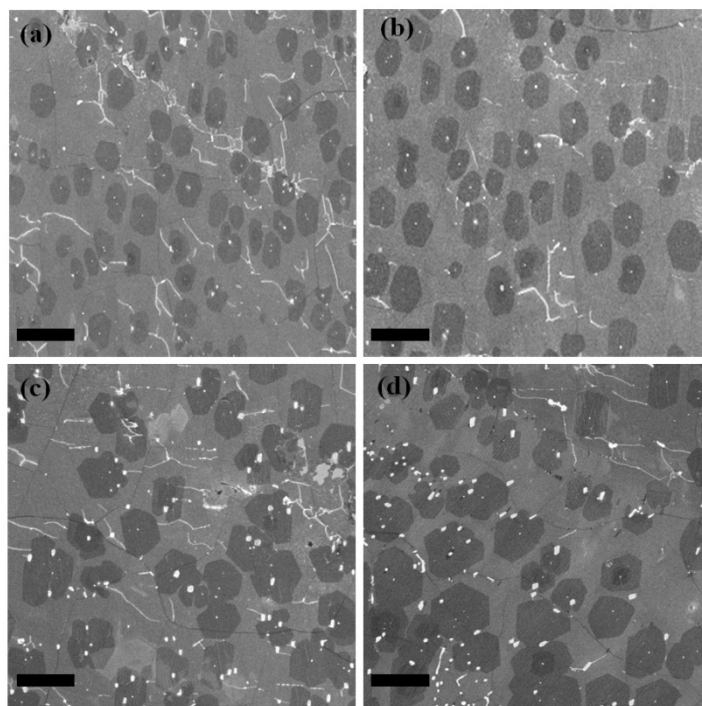

**Figure S3.** The influence of the methane flow rate on the growth of bilayer graphene. SEM images of bilayer graphene grown in a gas flow of 20 sccm hydrogen and (a) 20 sccm methane, (b) 15 sccm methane, (c) 12 sccm methane and (d) 10 sccm methane , respectively. All scale bars represent 10  $\mu\text{m}$ .

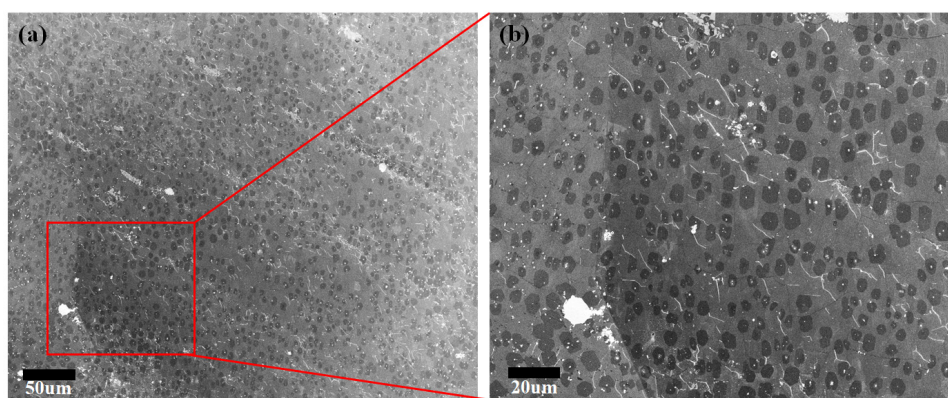

**Figure S4.** (a) SEM image of bilayer graphene in a region of  $\sim 0.5 \times 0.5 \text{ mm}^2$ . (b) Magnified SEM image of the bilayer area indicated by red rectangle in (a).
